# Supplementary material for: Post-vaccination T cell immunity to omicron
Source: PubMed Central journal article supplement (PMC9386871; doi:10.3389/fimmu.2022.944713), 2022-07-26
Supplement: DataSheet_1.pdf [file DataSheet_1.pdf]

**Supplementary table 1: Summary data on reviewed studies.**

| Author                 | Peer-reviewed* | Primary regimen           |                           | Booster Dose              | Prior infection | Breakthrough infection | Hybrid immunity | number of samples | Age (median, range) | Sex distribution (% female) | fold-change CD4 | fold-change CD8 | Type of analysis                                                                                                                                                                               | Comments                                                                                                                                        |
|------------------------|----------------|---------------------------|---------------------------|---------------------------|-----------------|------------------------|-----------------|-------------------|---------------------|-----------------------------|-----------------|-----------------|------------------------------------------------------------------------------------------------------------------------------------------------------------------------------------------------|-------------------------------------------------------------------------------------------------------------------------------------------------|
|                        |                | Dose 1                    | Dose 2                    |                           |                 |                        |                 |                   |                     |                             |                 |                 |                                                                                                                                                                                                |                                                                                                                                                 |
| Keeton et al.          | YES            | Janssen - Ad26.CoV2.S     | -                         | -                         | -               | -                      | -               | 20                | 41 [not provided]   | 75                          | 0.86            | 0.80            | Frequency of spike-specific T cells producing any of the measured cytokines (IFN- $\gamma$ , IL-2 or TNF) in response to peptide pools.                                                        |                                                                                                                                                 |
|                        |                | Janssen - Ad26.CoV2.S     | -                         | -                         | -               | -                      | -               | 20                | 38 [not provided]   | 75                          | 0.78            | 0.76            |                                                                                                                                                                                                |                                                                                                                                                 |
|                        |                | PfizerBioNTech - BNT162b2 | PfizerBioNTech - BNT162b2 | -                         | -               | -                      | -               | 15                | 53 [not provided]   | 53                          | 0.70            | 0.83            |                                                                                                                                                                                                |                                                                                                                                                 |
|                        |                | -                         | -                         | -                         | -               | WT / Beta              | -               | 15                | 39 [not provided]   | 12                          | 0.77            | 0.75            |                                                                                                                                                                                                |                                                                                                                                                 |
| Tarke et al.           | YES            | mRNA                      | mRNA                      | -                         | -               | -                      | -               | 19                | not provided        | not provided                | 0.84            | 0.85            | CD3 <sup>+</sup> CD4 <sup>+</sup> and CD3 <sup>+</sup> CD8 <sup>+</sup> AIM staining with OX40+CD137 <sup>+</sup> and CD69 <sup>+</sup> CD137 <sup>+</sup> markers, respectively.              |                                                                                                                                                 |
| De Marco et al.        | NO             | multiple                  | multiple                  | -                         | -               | -                      | -               | 10                | 43 [23-56]          | 70                          | 0.84            | 0.83            | Activation marker staining (CD69, CD40L for CD4 <sup>+</sup> and CD69 and CD137 for CD8 <sup>+</sup> T cells after peptide pool stimulation.                                                   | Data calculated from high-resolution figures; might not be 100% exact.                                                                          |
|                        |                | mRNA                      | mRNA                      | mRNA                      | -               | -                      | -               | 15                | 52 [26-60]          | 66                          | 0.75            | 0.91            |                                                                                                                                                                                                |                                                                                                                                                 |
|                        |                | multiple                  | multiple                  | multiple (heterologous)   | -               | -                      | -               | 11                | 53 [26-62]          | 73                          | 0.78            | 0.93            |                                                                                                                                                                                                |                                                                                                                                                 |
|                        |                | multiple                  | multiple                  | (multiple)                | YES             | -                      | YES             | 12                | 54 [22-60]          | 33                          | 0.82            | 0.89            |                                                                                                                                                                                                |                                                                                                                                                 |
|                        |                | multiple                  | multiple                  | (multiple)                | -               | YES                    | YES             | 13                | 37 [21-54]          | 69                          | 0.85            | 0.94            |                                                                                                                                                                                                |                                                                                                                                                 |
| Gao et al.             | YES            | PfizerBioNTech - BNT162b2 | PfizerBioNTech - BNT162b2 | -                         | -               | -                      | -               | 40                | 53 [22-79]          | 58                          | 0.91            | 0.92            | CD4 <sup>+</sup> T cell responses (CD69 <sup>+</sup> CD154 <sup>+</sup> ) and CD8 <sup>+</sup> T cell responses (CD69 <sup>+</sup> CD137 <sup>+</sup> ) after peptide pool stimulation.        |                                                                                                                                                 |
|                        |                | -                         | -                         | -                         | YES             | -                      | -               | 26                | 54 [44-68]          | 31                          | 0.84            | 0.70            |                                                                                                                                                                                                |                                                                                                                                                 |
| Liu et al.             | YES            | Janssen - Ad26.CoV2.S     | -                         | -                         | -               | -                      | -               | 20                | 43 [24-52]          | 55                          | 0.97            | 0.86            | IFN <sup>+</sup> CD4 <sup>+</sup> and CD8 <sup>+</sup> responses by ICS staining after peptide pool stimulation.                                                                               |                                                                                                                                                 |
|                        |                | PfizerBioNTech - BNT162b2 | PfizerBioNTech - BNT162b2 | -                         | -               | -                      | -               | 27                | 32 [22-67]          | 96                          | 0.82            | 0.82            |                                                                                                                                                                                                |                                                                                                                                                 |
| Naranbhai et al.       | YES            | multiple                  | multiple                  | -                         | -               | -                      | -               | 24                | not provided        | not provided                | 0.91            | 0.44            | CD4 <sup>+</sup> and CD8 <sup>+</sup> CFSE (carboxyfluorescein succinimidyl ester (CFSE) proliferation assay) responses after peptide pool stimulation.                                        |                                                                                                                                                 |
|                        |                | multiple                  | multiple                  | -                         | YES             | -                      | YES             | 12                |                     |                             | 1.00            | 0.62            |                                                                                                                                                                                                |                                                                                                                                                 |
|                        |                | multiple                  | multiple                  | multiple (heterologous)   | YES             | -                      | YES             | 13                |                     |                             | 1.14            | 0.83            |                                                                                                                                                                                                |                                                                                                                                                 |
| Tan et al.             | NO             | PfizerBioNTech - BNT162b2 | PfizerBioNTech - BNT162b2 | -                         | -               | -                      | -               | 41                | 36 [23-84]          | 78                          | 1.00            | 0.94            | IFN <sup>+</sup> CD4 <sup>+</sup> and CD8 <sup>+</sup> responses by ICS staining after peptide pool stimulation.                                                                               | Data calculated with raw data (supplementary) including two-dose data from a booster graph. No raw data were provided for the booster analysis. |
|                        |                | PfizerBioNTech - BNT162b2 | PfizerBioNTech - BNT162b2 | Janssen - Ad26.CoV2.S     | -               | -                      | -               | 41                |                     |                             | 0.96            | 1.19            |                                                                                                                                                                                                |                                                                                                                                                 |
|                        |                | PfizerBioNTech - BNT162b2 | PfizerBioNTech - BNT162b2 | -                         | -               | -                      | -               | 24                |                     |                             | 0.82            | 0.85            |                                                                                                                                                                                                |                                                                                                                                                 |
|                        |                | PfizerBioNTech - BNT162b2 | PfizerBioNTech - BNT162b2 | PfizerBioNTech - BNT162b2 | -               | -                      | -               | 24                |                     |                             | 0.89            | 1.18            |                                                                                                                                                                                                |                                                                                                                                                 |
|                        |                | PfizerBioNTech - BNT162b2 | PfizerBioNTech - BNT162b2 | PfizerBioNTech - BNT162b2 | -               | -                      | -               | 24                |                     |                             | 0.89            | 1.18            |                                                                                                                                                                                                |                                                                                                                                                 |
| Geurtsvankessel et al. | YES            | AstraZeneca - Vaxzevria   | AstraZeneca - Vaxzevria   | -                         | -               | -                      | -               | 15                | 63 [61-65]          | 60                          | 0.58            | 0.18            | CD3 <sup>+</sup> CD4 <sup>+</sup> and CD3 <sup>+</sup> CD8 <sup>+</sup> AIM staining with OX40 <sup>+</sup> CD137 <sup>+</sup> and CD69 <sup>+</sup> CD137 <sup>+</sup> markers, respectively. | Vaccine-specific data calculated from supplementary data only including subjects with reported measurements.                                    |
|                        |                | Janssen - Ad26.CoV2.S     | -                         | -                         | -               | -                      | -               | 13                | 39 [20-58]          | 92                          | 1.17            | 1.56            |                                                                                                                                                                                                |                                                                                                                                                 |
|                        |                | Moderna - mRNA-1273       | Moderna - mRNA-1273       | -                         | -               | -                      | -               | 14                | 35 [26-57]          | 79                          | 0.94            | 1.80            |                                                                                                                                                                                                |                                                                                                                                                 |
|                        |                | PfizerBioNTech - BNT162b2 | PfizerBioNTech - BNT162b2 | -                         | -               | -                      | -               | 5                 | 46 [36-57]          | 80                          | 0.94            | 0.57            |                                                                                                                                                                                                |                                                                                                                                                 |
|                        |                | Moderna - mRNA-1273       | Moderna - mRNA-1273       | PfizerBioNTech - BNT162b2 | -               | -                      | -               | 9                 | 29 [26-52]          | 78                          | 5.21            | 19.70           |                                                                                                                                                                                                |                                                                                                                                                 |
| Schultz et al.         | NO             | Sinovac - CoronaVac       | Sinovac - CoronaVac       | Sinovac - CoronaVac       | -               | -                      | -               | 30                | not provided        | not provided                | 0.83            | -               | CD3 <sup>+</sup> CD4 <sup>+</sup> AIM staining with OX40 <sup>+</sup> CD137 <sup>+</sup> .                                                                                                     |                                                                                                                                                 |
| Madelon et al.         | NO             | mRNA                      | mRNA                      | -                         | -               | -                      | -               | 20                | 46 [not provided]   | 45                          | 0.62            | 0.79            | CD4 <sup>+</sup> and CD8 <sup>+</sup> AIM staining with OX40 <sup>+</sup> 41-BB <sup>+</sup> and CD69 <sup>+</sup> 41-BB <sup>+</sup> markers, respectively.                                   | anti-CD20-treated multiple sclerosis patients.                                                                                                  |
|                        |                | mRNA                      | mRNA                      | mRNA                      | -               | -                      | -               | 20                |                     |                             | 0.72            | 0.71            |                                                                                                                                                                                                |                                                                                                                                                 |
| Soto et al.            | NO             | Sinovac - CoronaVac       | Sinovac - CoronaVac       | -                         | -               | -                      | -               | 32                | not provided [3-17] | not provided                | 1.63            | -               | CD3 <sup>+</sup> CD4 <sup>+</sup> AIM staining with OX40 <sup>+</sup> CD137 <sup>+</sup> .                                                                                                     | 3-17 year-old children.                                                                                                                         |
| Mazzoni et al.         | YES            | PfizerBioNTech - BNT162b2 | PfizerBioNTech - BNT162b2 | -                         | -               | -                      | -               | 11                | 56 [23-65]          | 64                          | 0.87            | -               | Spike-specific CD4 <sup>+</sup> T cells by ICS staining (IFN- $\gamma$ and IL-2) after peptide pool stimulation.                                                                               |                                                                                                                                                 |
|                        |                | PfizerBioNTech - BNT162b2 | PfizerBioNTech - BNT162b2 | PfizerBioNTech - BNT162b2 | -               | -                      | -               | 9                 | not provided        | not provided                | 0.82            | -               |                                                                                                                                                                                                |                                                                                                                                                 |
| Choi et al.            | YES            | PfizerBioNTech - BNT162b2 | PfizerBioNTech - BNT162b2 | -                         | -               | -                      | -               | 12                | not provided        | not provided                | 0.84            | 0.80            | Spike-specific CD4 <sup>+</sup> and CD8 <sup>+</sup> T cells by ICS staining (IFN- $\gamma$ ) after peptide pool stimulation.                                                                  |                                                                                                                                                 |

\* at submission of this review.
